# Supplementary material for: Ni–Co sulfide nanowires on nickel foam with ultrahigh capacitance for asymmetric supercapacitors
Source: Royal Society of Chemistry journal article supplement (doi:10.1039/c3ta15373h), 2014-01-01
Supplement: c3ta15373h1.pdf [file c3ta15373h1.pdf]

Electronic Supplementary Information

**Ni-Co sulfides nanowires on nickel foam with ultrahigh capacitance  
for asymmetric supercapacitor**

Yanhong Li,<sup>a</sup> LiuJun Cao,<sup>b</sup> Lei Qiao,<sup>b</sup> Ming Zhou,<sup>b</sup> Yang Yang,<sup>b</sup> Peng Xiao,<sup>\* a,b</sup> and  
Yunhuai Zhang<sup>\* b</sup>

<sup>a</sup> *College of Physics, Chongqing University, Chongqing 400044, China*

<sup>b</sup> *College of Chemical Engineering, Chongqing University, Chongqing 400044, China*

---

\* Corresponding author. Tel-86-23-65102031

Email address: [xiaopeng@cqu.edu.cn](mailto:xiaopeng@cqu.edu.cn)

[xp2031@163.com](mailto:xp2031@163.com)

### **Figure captions**

**Figure S1.** Nitrogen adsorption and desorption isotherms of (a) Ni-Co oxides and (b) Ni-Co sulfides. The insets are the corresponding Barrett-Joyner-Halenda (BJH) pore size distribution.

**Figure S2.** (a) EDS spectrum result and (b) Full XPS of the Ni-Co sulfides. (c) Comparison of XRD patterns of Ni-Co sulfides obtained at different reaction time during the second synthesis process. Triangle and rhombus stand for the peaks of Ni-Co oxides and sulfides, respectively.

After 6 hours reaction, four peaks appear, but the peak intensities are weak. After 12 hours reaction, the peak intensities show increases. For the samples obtained after 24 h and 36 h, the peak positions peak intensities are the same as those of obtained after 12 h.

**Figure S3.** (a) The linear relations of the square root of the scan rate dependence of the oxidation peak current at different scan rates for Ni-Co sulfides NWAs. (b) Galvanostatic discharge plots of a clean Ni foam conducted under the same condition.

**Figure S4.** (a and b) SEM images of the Ni-Co sulfides NWAs after 1000 continuous cycling tests. Inset in (a) is a magnified image. (c) Nyquist plots of the Ni-Co sulfides NWAs before and after 1000 cycles.

**Figure S5.** (a) CV curves of Ni-Co sulfides and activated carbon (AC) electrodes performed in a three-electrode cell at scan rate of  $5 \text{ mV s}^{-1}$ . (b) CV curves of the asymmetric supercapacitor in different voltage ranges at scan rate of  $100 \text{ mV s}^{-1}$ .

**Table S1.** Comparison of electrochemical performance of different electrode materials

**Table S2.** The values of the elements in equivalent circuit fitted in the Nyquist plots of Figure S4c.

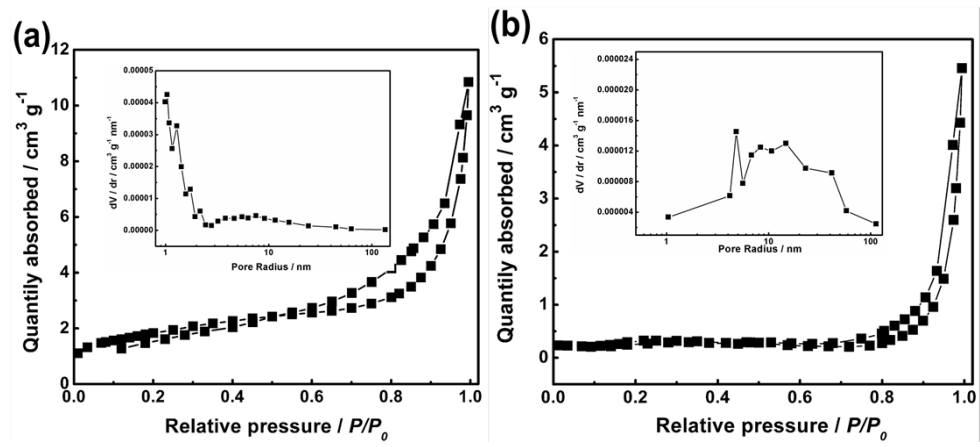

Figure S1

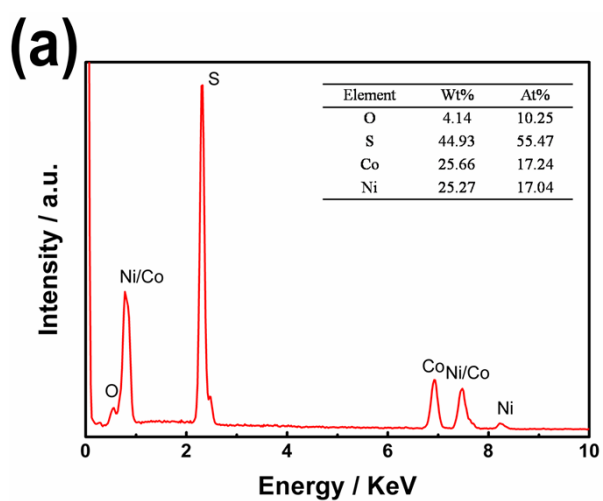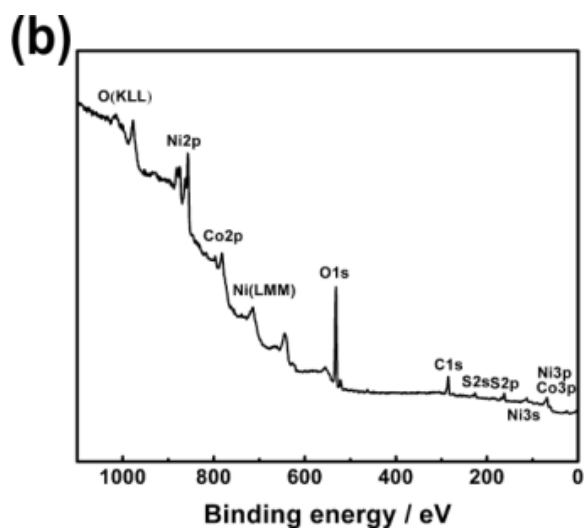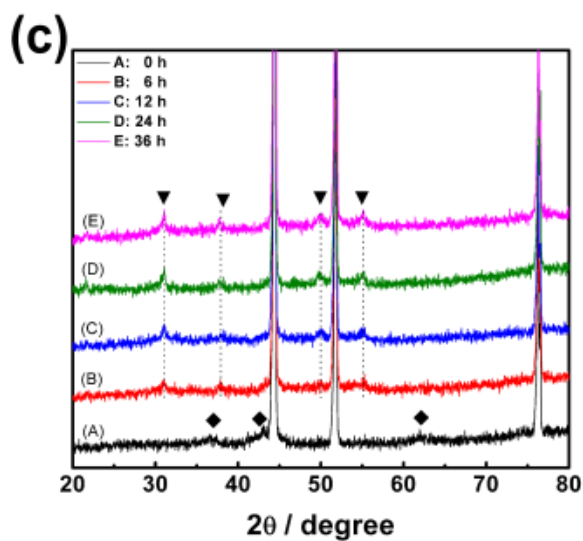

Figure S2

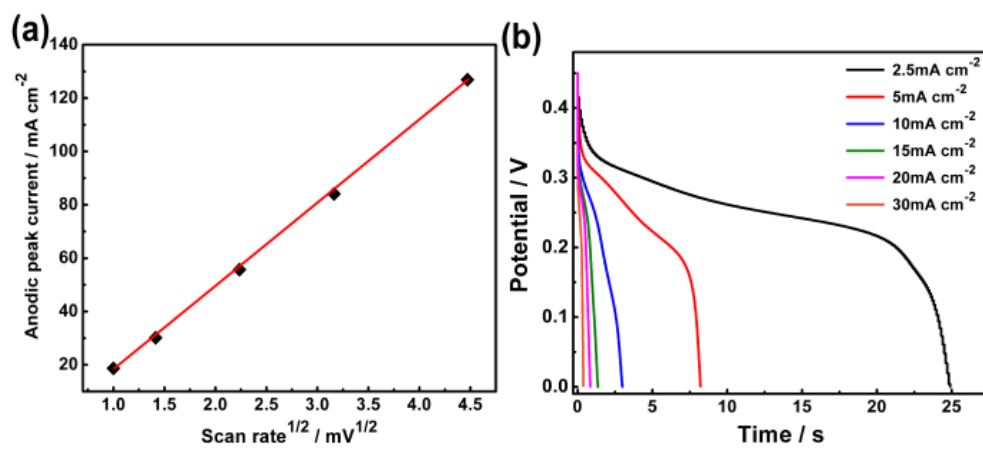

Figure S3

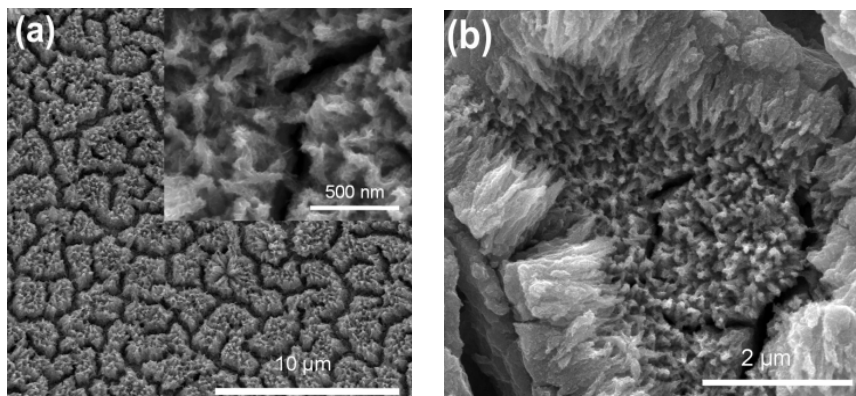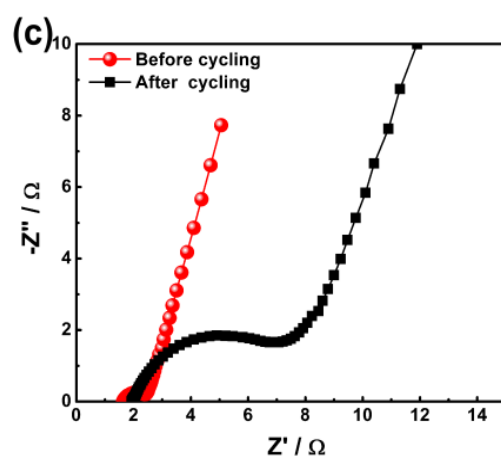

Figure S4

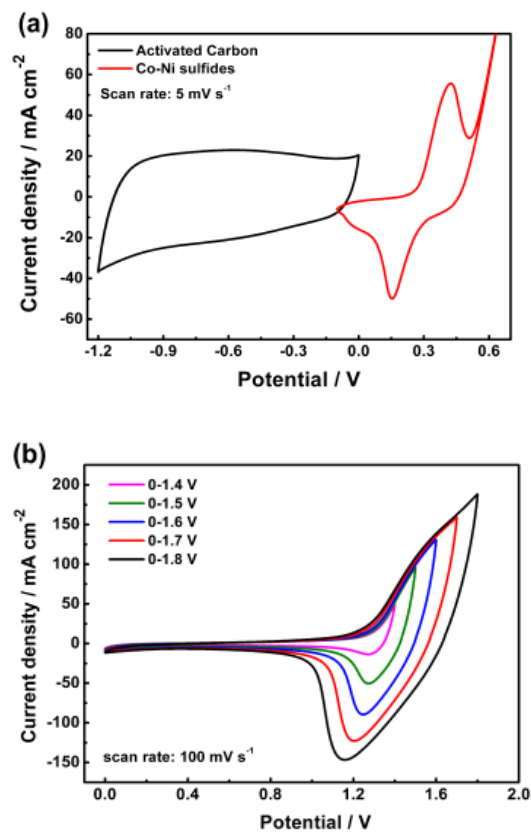

Figure S5



**Table S1.** Comparison of electrochemical performance of different electrode materials

| Electrode materials                                | Capacitance                                                                | Rate capacitance retention                  | Capacitance retention after cycling                                         | Reference |
|----------------------------------------------------|----------------------------------------------------------------------------|---------------------------------------------|-----------------------------------------------------------------------------|-----------|
| Ni-Co sulfides (in this article)                   | 2053 F g <sup>-1</sup> (5.1 F cm <sup>-2</sup> ) at 5 mA cm <sup>-2</sup>  | 57% from 5 to 30 mA cm <sup>-2</sup>        | 78.5% after 3000 cycles at 15 mA cm <sup>-2</sup>                           | /         |
| Co <sub>9</sub> S <sub>8</sub> nanorods            | 783.3 F g <sup>-1</sup> (2.35 F cm <sup>-2</sup> ) at 5 mV s <sup>-1</sup> | 24% from 5 to 200 mV s <sup>-1</sup>        | 92% after 2000 cycles at 10 mA cm <sup>-2</sup>                             | Ref. 40   |
| Co <sub>3</sub> S <sub>4</sub> hollow nanospheres  | 522.4 F g <sup>-1</sup> at 0.5 A g <sup>-1</sup>                           | 66% from 0.5 to 5 A g <sup>-1</sup>         | 54.5% after 1000 cycles at 0.5 A g <sup>-1</sup>                            | Ref. 41   |
| NiS hollow spheres                                 | 927 F g <sup>-1</sup> at 4.08 A g <sup>-1</sup>                            | 62.8% from 4.08 to 10.2 A g <sup>-1</sup>   | 71.3% after 1000 cycles at 4.2 A g <sup>-1</sup>                            | Ref. 42   |
| Flaky Ni <sub>3</sub> S <sub>2</sub>               | 717 at 2 A g <sup>-1</sup>                                                 | 57.3% from 2 to 32 A g <sup>-1</sup>        | 62% after 1000 cycles at 4 A g <sup>-1</sup>                                | Ref. 43   |
| NiCo <sub>2</sub> O <sub>4</sub> nanoneedles       | 3.12 F cm <sup>-2</sup> at 1.11 mA cm <sup>-2</sup>                        | 31.7% from 1.11 to 5.56 mA cm <sup>-2</sup> | 89.3% after 2000 cycles at 5.56 mA cm <sup>-2</sup>                         | Ref. 11   |
| NiCo <sub>2</sub> O <sub>4</sub> nanowires         | 743 F g <sup>-1</sup> at 1 A g <sup>-1</sup>                               | 78.6% from 1 to 40 A g <sup>-1</sup>        | 93.8% after 3000 cycles based on the maximum value at 20 mV s <sup>-1</sup> | Ref. 6    |
| NiCo <sub>2</sub> O <sub>4</sub> nanosheets        | 2010 F g <sup>-1</sup> at 2 A g <sup>-1</sup>                              | 72% from 2 to 20 A g <sup>-1</sup>          | 94% after 2400 cycles                                                       | Ref. 9    |
| Ni <sub>0.3</sub> Co <sub>2.7</sub> O <sub>4</sub> | 960 F g <sup>-1</sup> at 0.625 A g <sup>-1</sup>                           | 74.2% from 0.625 to 6.25 A g <sup>-1</sup>  | 98.1% after 3000 cycles at 0.625 A g <sup>-1</sup>                          | Ref. 3    |

|                                                                                |                                                   |                                          |                                                                           |         |
|--------------------------------------------------------------------------------|---------------------------------------------------|------------------------------------------|---------------------------------------------------------------------------|---------|
| NiO/NiCo <sub>2</sub> O <sub>4</sub> /Co <sub>3</sub> O <sub>4</sub> composite | 1717 F g <sup>-1</sup> at 5 mA cm <sup>-2</sup>   | 70.9% from 5 to 50 mA cm <sup>-2</sup>   | 94.9% after 1000 cycles at 20 mA cm <sup>-2</sup>                         | Ref. 44 |
| Co <sub>3</sub> O <sub>4</sub> /Ni(OH) <sub>2</sub> nanosheets                 | 1144 F g <sup>-1</sup> at 5 mV s <sup>-1</sup>    | 66 % from 5 to 100 mV s <sup>-1</sup>    | 93.4% after 500 cycles based on the maximum value at 5 mV s <sup>-1</sup> | Ref. 45 |
| Urchin-like NiCo <sub>2</sub> S <sub>4</sub>                                   | 1149 F g <sup>-1</sup> at 1 A g <sup>-1</sup>     | 66.2% from 1 to 50 A g <sup>-1</sup>     | 91.4% after 5000 cycles at 20 A g <sup>-1</sup>                           | Ref. 21 |
| NiCo <sub>2</sub> S <sub>4</sub> nanosheets                                    | ~1300 F g <sup>-1</sup> at 3 A g <sup>-1</sup>    | ~30.7% from 3 to 20 A g <sup>-1</sup>    | 82% after 2000 cycles at 5 A g <sup>-1</sup>                              | Ref. 24 |
| Co <sub>3</sub> O <sub>4</sub> @Co(OH) <sub>2</sub> nanowires                  | 1095 F g <sup>-1</sup> at 1 A g <sup>-1</sup>     | 74% from 1 to 40 A g <sup>-1</sup>       | 88.5% after 2000 cycles at 2 A g <sup>-1</sup>                            | Ref. 47 |
| Co <sub>3</sub> O <sub>4</sub> @NiO nanowires                                  | 853 F g <sup>-1</sup> at 2 A g <sup>-1</sup>      | 85% from 2 to 40 A g <sup>-1</sup>       | 95.1% after 6000 cycles at 2 A g <sup>-1</sup>                            | Ref. 48 |
| CoO@NiHON nanowires                                                            | 798.3 F g <sup>-1</sup> at 1.67 A g <sup>-1</sup> | 84% from 1.67 to 13.33 A g <sup>-1</sup> | 96.7% after 2000 cycles at 10 A g <sup>-1</sup>                           | Ref. 38 |
| NiCo <sub>2</sub> S <sub>4</sub> nanotube                                      | 2398 F g <sup>-1</sup> at 5 mA cm <sup>-2</sup>   | 67.7% from 5 to 150 mA cm <sup>-2</sup>  | 92% retention after 5000 cycles at 50 mA cm <sup>-2</sup>                 | Ref. 46 |

**Table S2.** The values of the elements in equivalent circuit fitted in the Nyquist plots of Figure S4c.

| Electrodes     | $R_s$ ( $\Omega$ ) | $R_{ct}$ ( $\Omega$ ) | $CPE_1$ | $CPE_2$ |
|----------------|--------------------|-----------------------|---------|---------|
| Before cycling | 1.628              | 0.8266                | 0.04325 | 1.082   |
| After cycling  | 1.947              | 5.58                  | 0.02053 | 0.6679  |
